# Supplementary material for: Reversible piezochromic luminescence of 9,10-bis[(N-alkylcarbazol-3-yl)vinyl]anthracenes and the dependence on N-alkyl chain length
Source: Royal Society of Chemistry journal article supplement (doi:10.1039/c2tc00470d), 2012-11-20
Supplement: c2tc00470d.pdf [file c2tc00470d.pdf]

## Supporting Information

### Reversible Piezochromic Luminescence of 9,10-Bis[*N*-alkylcarbazol-3-yl]vinyl]anthracenes and the Dependence on *N*-alkyl Chain Length

Yalong Wang, Wei Liu, Lingyu Bu, Jinfeng Li, Meng Zheng, Deteng Zhang, Mingxiao Sun, Yong Tao, Shanfeng Xue and Wenjun Yang\*

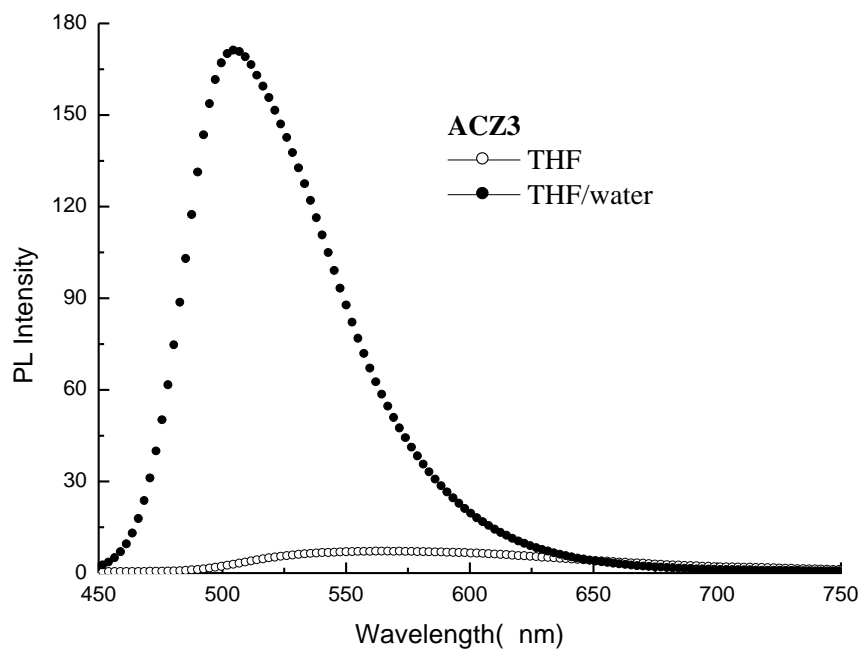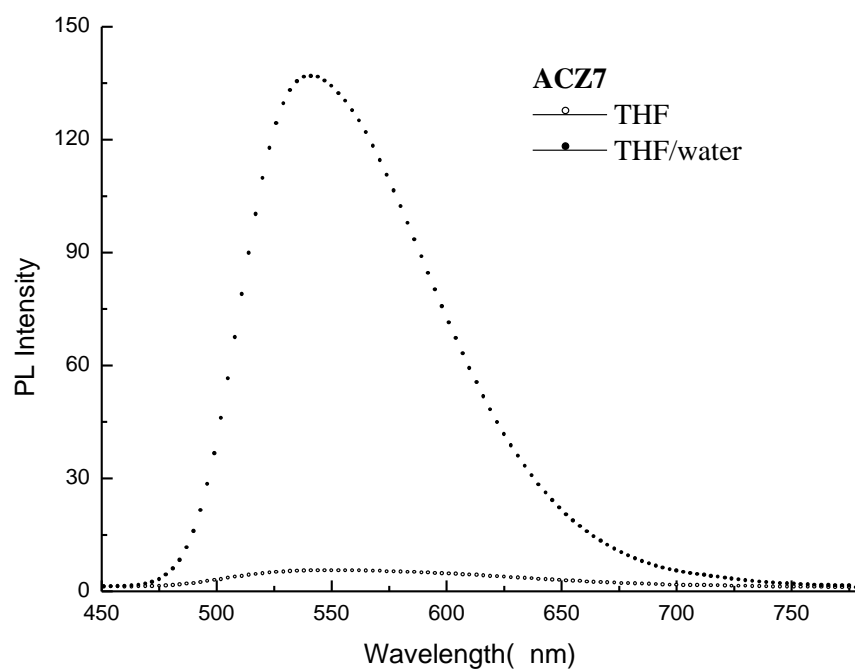

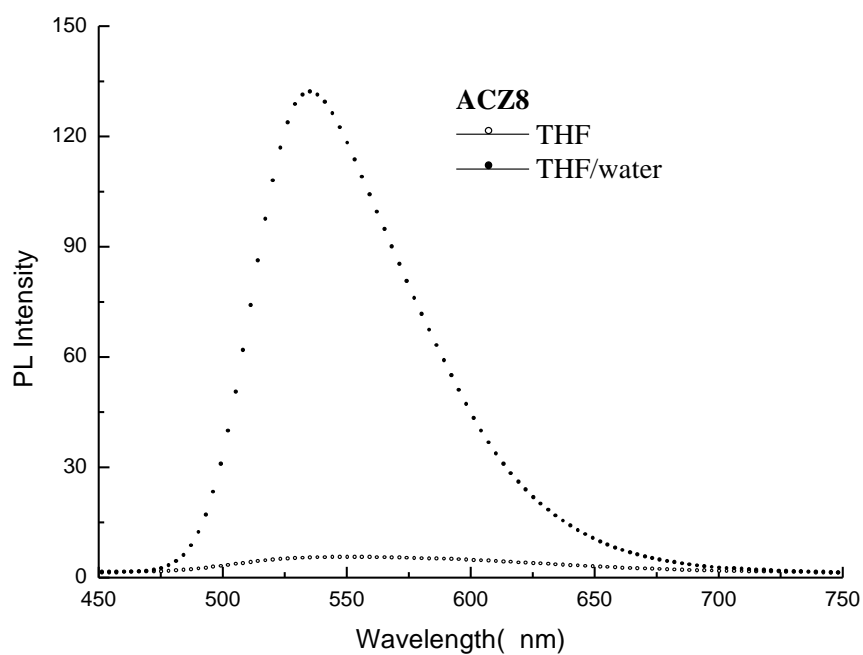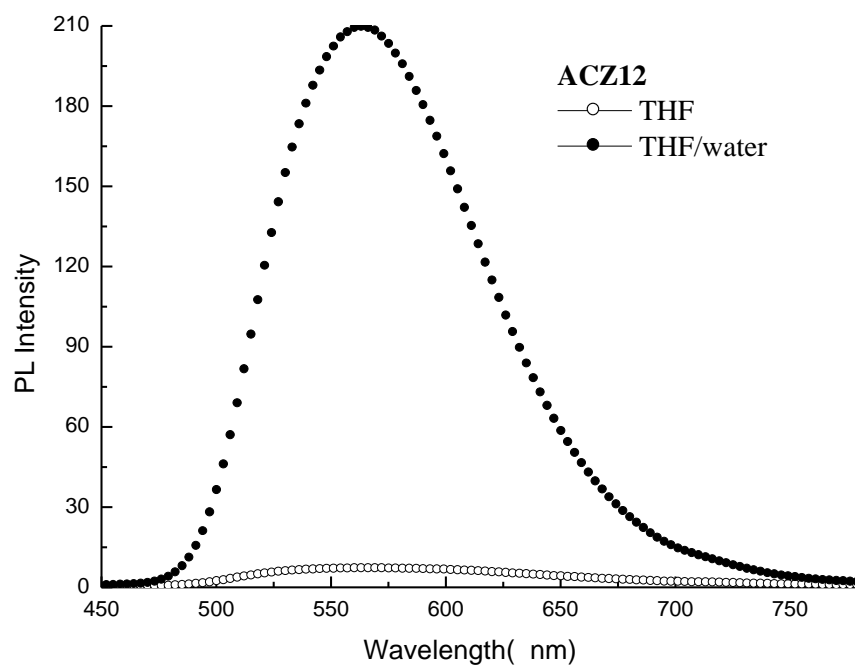

**Fig. S1** Emission spectra of **ACZn** in THF and THF/water mixture (1/9 in volume) (excited at 410 nm).

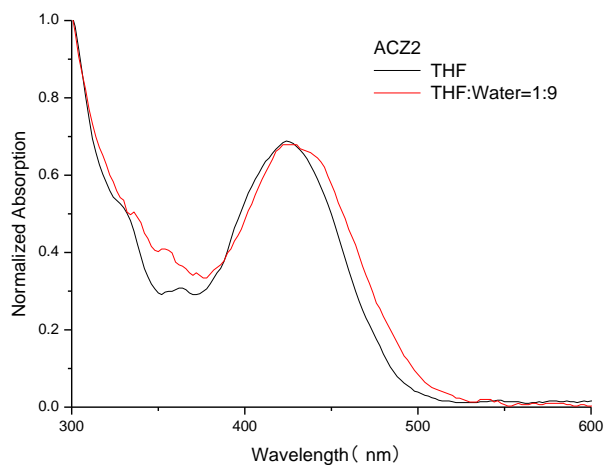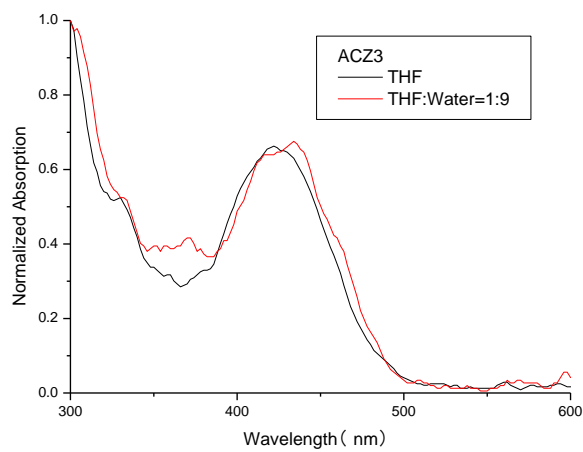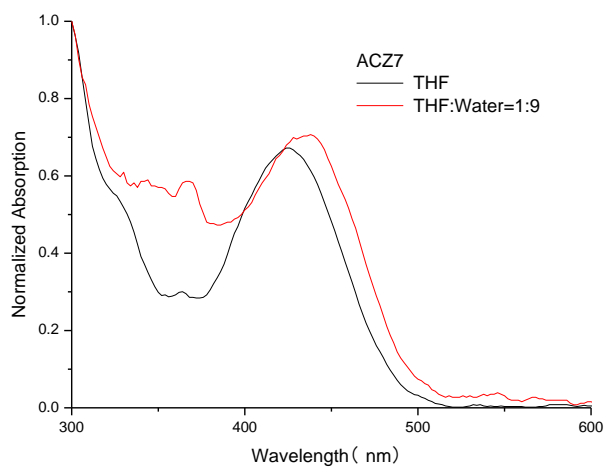

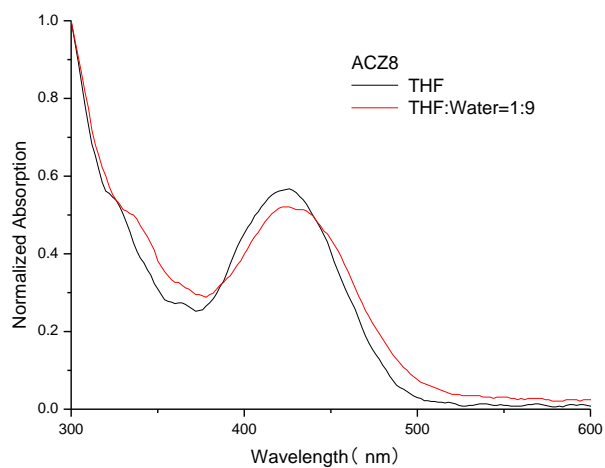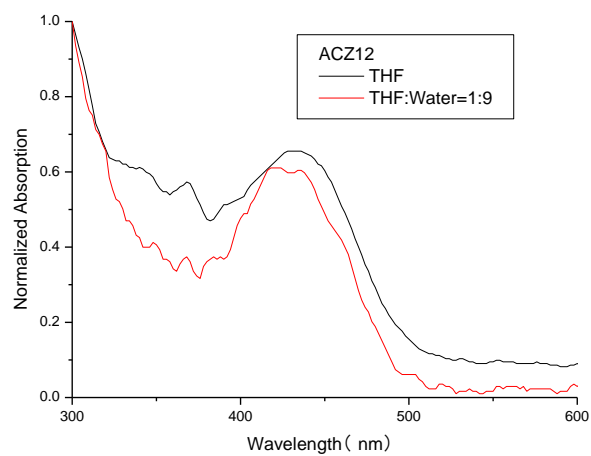

**Fig. S2** Absorption spectra of **ACZn** in THF and THF/water mixture (1/9 in volume).

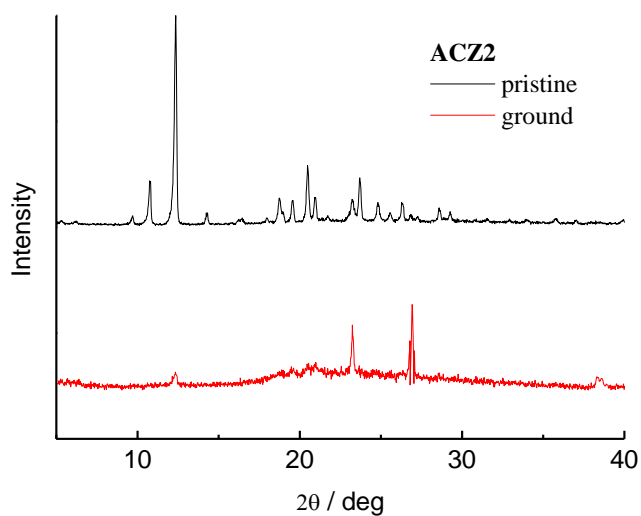

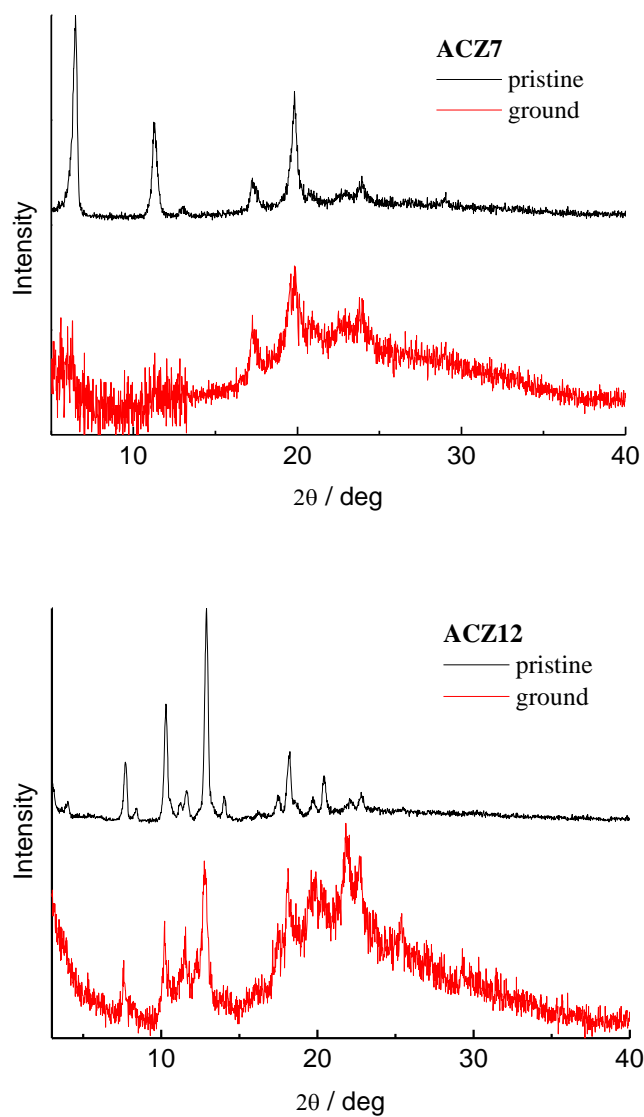

**Fig. S3** Powder X-ray diffraction patterns of other pristine and ground **ACZ<sub>n</sub>** samples at room temperature.

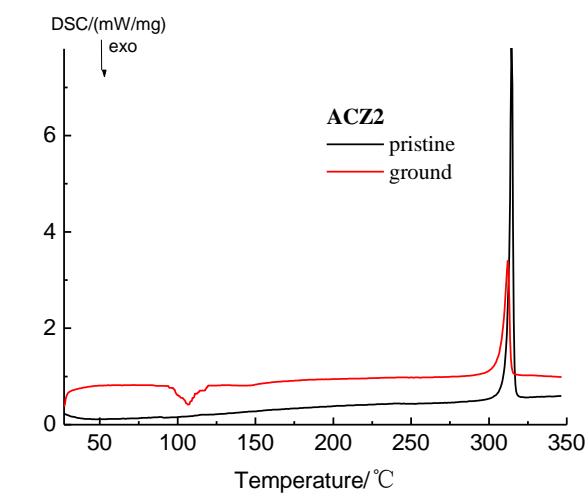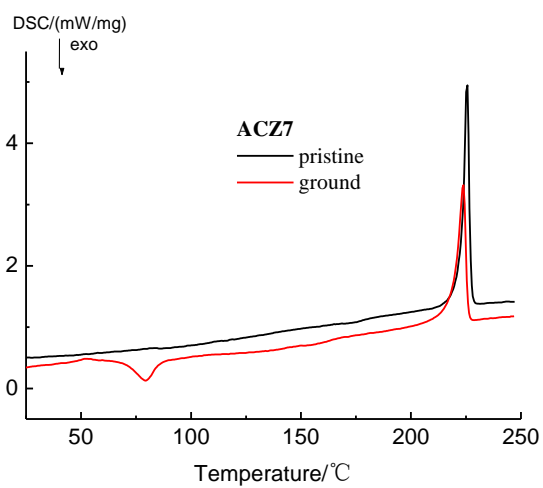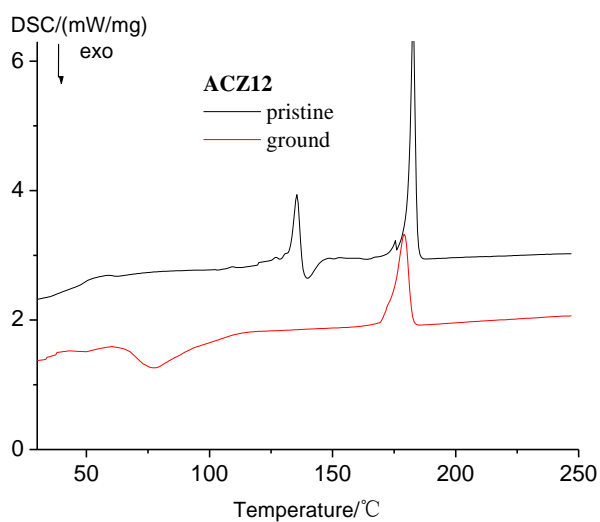

**Fig. S4** DSC curves of other pristine and ground ACZn samples.

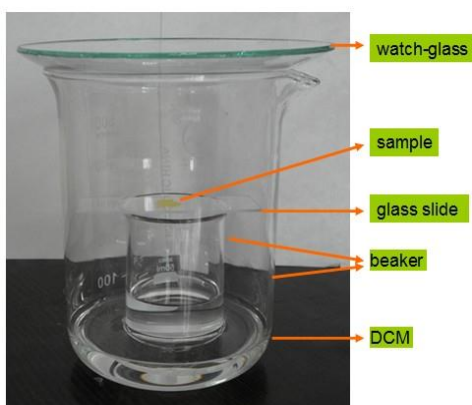

**Fig. S5** The solvent-fuming diagram (at room temperature).
